# Supplementary material
Source: publisher figshare collection journal article supplement (https://acs.figshare.com/ndownloader/files/3781885)
Supplement: Supplementary file 1 [file 3781885]

## Sheet: Shoots DEGs
After the FDR adjustment, there were no genes that met a FDR adjusted P value < 0.05 from ENM or Bulk/Dissolved in the shoots compared to control treatment. No genes identified with FDR ajusted P value < 0.1 in the shoots exposed to Bulk/Dissolved that compared to control treatment.
File S4 Table 1. 7 genes identified (≤-1.5-fold, FDR adjusted P value <0.1) exposed to ENM in the shoots compared to control treatment.
Probeset ID	Gene Symbol	Gene Title	RefSeq Transcript ID	Fold-Change (ENM_shoots vs. Control_shoots)	P-value (ENM_shoots vs. Control_shoots)
Mtr.37911.1.S1_at	MTR_2g013030	Polyphenol oxidase A1	XM_003593469	5.98213	1.75737e-05
Mtr.24412.1.S1_at	MTR_1g019480	Alpha amylase	XM_003589143	5.485	9.25309e-06
Mtr.35334.1.S1_s_at	MTR_7g083410	Glycerophosphodiester phosphodiesterase	XM_003624400	3.89206	2.64754e-05
Mtr.38349.1.S1_at	MTR_5g090970	NAC domain protein IPR003441	XM_003617334	2.58119	4.40461e-06
Mtr.43734.1.S1_at	MTR_7g082530	Ser/Thr protein kinase	XM_003624325	2.44354	2.79057e-06
Mtr.4663.1.S1_at	MTR_4g013730	Macrophage migration inhibitory factor-like protein	XM_003604454	1.68274	1.34325e-05
Mtr.8177.1.S1_at	MTR_060s0028	LRR receptor-like serine/threonine-protein kinase GSO1	XM_003636756	1.6097	9.02052e-06

## Sheet: Roots DEGs
After the FDR adjustment, there were no genes that met a FDR adjusted P value < 0.05 or FDR adjusted P value < 0.1 from Bulk/Dissolved in the roots compared to control treatment.
File S4 Table 2. 88 genes (30 genes up-regulated and 58 genes down-regulated) identified (≤-1.5-fold, FDR adjusted P value < 0.05) exposed to ENM in the roots compared to control treatment.
Probeset ID	Gene Symbol	Gene Title	RefSeq Transcript ID	Fold-Change (ENM_shoots vs. Control_shoots)	P-value (ENM_shoots vs. Control_shoots)
Mtr.46283.1.S1_s_at	MTR_2g069300	1-aminocyclopropane-1-carboxylate oxidase-like protein	XM_003596137	57.8882	4.92289e-06
Mtr.14635.1.S1_at	MTR_5g074710	Peroxidase	XM_003615928	42.2048	1.83686e-05
Mtr.35354.1.S1_at	MTR_3g080090	Cation diffusion facilitator	XM_003601332	29.4203	0.000113357
Mtr.41979.1.S1_at	MTR_2g030460	MtN19 protein	XM_003594500	26.3452	9.85404e-05
Mtr.15278.1.S1_s_at	MTR_7g100080	Zinc finger protein	XM_003625474	17.9048	7.90337e-05
Mtr.37075.1.S1_at	MTR_5g075680	Metal tolerance protein	XM_003616011	14.3258	8.73728e-05
Mtr.3265.1.S1_at	MTR_2g042340	hypothetical protein	XM_003595261	13.3452	8.3452e-05
Mtr.42756.1.S1_at	MTR_8g018110	F-box protein	XM_003627095	13.1008	7.41563e-05
Mtr.17288.1.S1_at	MTR_3g088460	Metal transporter	XM_003602007	12.6839	5.41e-05
Mtr.1950.1.S1_at	MTR_5g040970	hypothetical protein	XM_003613744	11.8491	1.91252e-05
Mtr.15793.1.S1_at	MTR_5g018990	Cytochrome P450	XM_003611836	10.0326	2.78378e-06
Mtr.32980.1.S1_at	MTR_050s0020	ABC transporter B family member	XM_003636590	9.46021	2.83436e-06
Mtr.6122.1.S1_at	MTR_4g092580	Branched-chain-amino-acid aminotransferase	XM_003608269	6.73162	7.99346e-05
Mtr.709.1.S1_at	MTR_6g092670	Type I inositol-1,4,5-trisphosphate 5-phosphatase	XM_003620889	6.48661	5.17893e-06
Mtr.18489.1.S1_at	MTR_6g012160	Quinone oxidoreductase-like protein	XM_003618438	6.44058	1.67639e-07
Mtr.50397.1.S1_at	MTR_7g011090	hypothetical protein	XM_003621215	5.86501	7.08148e-05
Mtr.17298.1.S1_at	MTR_8g088250	hypothetical protein	XM_003629863	4.77715	9.02192e-05
Mtr.25183.1.S1_x_at	MTR_1g088530	hypothetical protein	XM_003591477	4.36348	3.01073e-05
Mtr.42318.1.S1_at	MTR_5g076350	Ubiquitin	XM_003616075	4.24015	7.01581e-05
Mtr.52221.1.S1_at	MTR_5g005520	Cysteine-rich receptor-like protein kinase	XM_003610606	3.94443	0.000134194
Mtr.50565.1.S1_at	MTR_3g082440	Endoglucanase	XM_003601458	3.80237	8.96761e-05
Mtr.14771.1.S1_at	MTR_7g079530	Phosphoglycolate phosphatase	XM_003624080	2.96531	4.4554e-05
Mtr.12525.1.S1_at	MTR_1g099310	Chitinase	XM_003592106	2.87617	7.06729e-05
Mtr.38007.1.S1_at	MTR_1g090250	Oleosin	XM_003591605	2.72883	3.49662e-06
Mtr.29167.1.S1_s_at	MTR_7g088590	Protein Mpv17	XM_003624829	2.67605	5.98622e-05
Mtr.47064.1.S1_at	MTR_7g080120	Swarming motility protein ybiA	XM_003624135	2.58258	0.000113097
Mtr.25499.1.S1_at	MTR_7g109850	NifU-like protein	XM_003625951	1.69842	3.5799e-05
Mtr.41006.1.S1_at	MTR_1g050640	Xylem serine proteinase	XM_003590206	1.64719	0.000137782
Mtr.2482.1.S1_at	MTR_5g029600	hypothetical protein	XM_003612787	1.54907	0.000151403
Mtr.41621.1.S1_at	MTR_5g084980	hypothetical protein	XM_003616808	1.50411	4.39667e-05
Mtr.40328.1.S1_at	MTR_1g093120	1-aminocyclopropane-1-carboxylate oxidase-like protein	XM_003591751	-2.64172	0.000107383
Mtr.6956.1.S1_at	MTR_8g020840	Nodulation signaling pathway 1 protein	XM_003627246	-2.65304	9.13885e-05
Mtr.5847.1.S1_at	MTR_3g106230	Zinc finger protein	XM_003603265	-4.74815	0.000164272
Mtr.40270.1.S1_at	MTR_2g085510	High-affinity nitrate transporter	XM_003596727	-21.4561	0.000148293
Mtr.43750.1.S1_at	MTR_1g056530	Nuclear transcription factor Y subunit A-10	XM_003590278	-23.2103	6.95409e-05
Mtr.33.1.S1_at	MTR_5g084670	Nodule-specific glycine-rich protein 1J	XM_003616777	-27.3259	2.81573e-05
Mtr.42446.1.S1_at	MTR_3g073180	Nitrate reductase	XM_003601066	-28.5966	1.83094e-05
Mtr.21234.1.S1_at	MTR_2g014250	hypothetical protein	XM_003593574	-57.2669	5.63954e-05
Mtr.3625.1.S1_at	MTR_5g070410	CCP	XM_003615594	-74.211	1.93701e-06
Mtr.13159.1.S1_at	MTR_1g042895	CCP	XM_003589969	-77.0009	2.1839e-05
Mtr.4707.1.S1_at	MTR_5g061290	Ubiquitin	XM_003614873	-77.6149	5.44925e-05
Mtr.4676.1.S1_at	MTR_8g089360	High affinity cationic amino acid transporter	XM_003629969	-83.9687	4.83525e-05
Mtr.13449.1.S1_at	MTR_2g030470	MtN19 protein	XM_003594501	-84.7252	2.00675e-05
Mtr.630.1.S1_at	MTR_4g085800	PI-PLC X domain-containing protein	XM_003607900	-95.46	8.0861e-05
Mtr.14503.1.S1_at	MTR_7g086040	MtN20 protein	XM_003624605	-106.199	9.73351e-06
Mtr.30996.1.S1_at	MTR_7g114870	IQ domain-containing protein	XM_003626372	-110.1	1.40191e-05
Mtr.13003.1.S1_at	MTR_8g098650	hypothetical protein	XM_003630498	-118.941	9.42429e-05
Mtr.31116.1.S1_at	MTR_3g062820	CCP	XM_003600523	-149.304	0.000109121
Mtr.2244.1.S1_at	MTR_7g071220	CCP	XM_003623421	-159.769	5.17338e-05
Mtr.2006.1.S1_at	MTR_5g068590	CCP	XM_003615429	-188.716	3.87155e-05
Mtr.11429.1.S1_x_at	MTR_7g027120	CCP	XM_003622043	-241.844	6.46852e-05
Mtr.44040.1.S1_at	MTR_5g044140	Nodule-specific cysteine-rich peptide	XM_003614001	-251.809	0.000117787
Mtr.15206.1.S1_at	MTR_4g070690	CCP	XM_003606918	-263.31	2.04634e-06
Mtr.8510.1.S1_at	MTR_1g030270	Early nodulin	XM_003589532	-264.497	3.88972e-06
Mtr.3277.1.S1_at	MTR_7g032920	CCP	XM_003622267	-282.514	0.00016321
Mtr.3210.1.S1_at	MTR_7g029760	CCP	XM_003622127	-302.932	9.14049e-05
Mtr.40512.1.S1_at	MTR_086s0024	CCP	XM_003637400	-305.775	0.000170884
Mtr.10467.1.S1_at	MTR_6g091470	Nodule-specific cysteine-rich peptide	XM_003620807	-313.941	2.03812e-05
Mtr.27430.1.S1_at	MTR_4g060000	CCP	XM_003606380	-320.711	7.08335e-05
Mtr.40467.1.S1_at	MTR_7g065770	Early nodulin ENOD18	XM_003623165	-333.721	7.34916e-05
Mtr.42875.1.S1_s_at	MTR_7g071720	CCP	XM_003623450	-411.798	0.000122137
Mtr.38519.1.S1_at	MTR_3g055510	Calmodulin-like protein	XM_003600161	-419.58	0.0001076
Mtr.37625.1.S1_at	MTR_3g016020	CCP	XM_003598543	-434.902	5.47024e-05
Mtr.49594.1.S1_at	MTR_2g103310	hypothetical protein	XM_003597807	-453.658	4.75441e-05
Mtr.40336.1.S1_at	MTR_054s0031	CCP	XM_003636688	-467.675	1.39306e-05
Mtr.11160.1.S1_at	MTR_7g022430	CCP	XM_003621705	-488.12	0.000145663
Mtr.43351.1.S1_at	MTR_3g015870	CCP	XM_003598536	-493.627	2.18606e-05
Mtr.37302.1.S1_s_at	MTR_021s0032	CCP	XM_003635943	-496.414	4.12643e-05
Mtr.8699.1.S1_at	MTR_2g042470	Nodule-specific glycine-rich protein 2D	XM_003595272	-501.945	2.43981e-05
Mtr.13022.1.S1_at	MTR_2g061035	hypothetical protein	XM_003595758	-504.901	4.32384e-05
Mtr.40226.1.S1_at	MTR_7g027180	CCP	XM_003622046	-523.869	1.81219e-06
Mtr.8340.1.S1_s_at	MTR_4g065160	CCP	XM_003606698	-537.327	8.1515e-05
Mtr.9238.1.S1_at	MTR_7g045520	CCP	XM_003622520	-557.805	5.58549e-05
Mtr.10578.1.S1_at	MTR_3g055570	Calmodulin-like protein	XM_003600165	-588.616	7.77299e-05
Mtr.40227.1.S1_x_at	MTR_7g027125	CCP	XM_003622044	-595.94	9.18341e-06
Mtr.43113.1.S1_at	MTR_3g065710	CCP	XM_003600689	-643.717	2.19621e-05
Mtr.40134.1.S1_x_at	MTR_1g011540	Leghemoglobin	XM_003588641	-646.307	7.63751e-05
Mtr.10836.1.S1_at	MTR_4g026750	CCP	XM_003605169	-676.8	1.4228e-05
Mtr.40251.1.S1_at	MTR_6g091440	CCP	XM_003620804	-785.801	2.01901e-05
Mtr.43103.1.S1_s_at	MTR_5g056185	CCP	XM_003614564	-814.351	2.73819e-05
Mtr.8477.1.S1_at	MTR_3g062775	CCP	XM_003600519	-904.715	9.54739e-07
Mtr.40309.1.S1_s_at	MTR_3g055450	hypothetical protein	XM_003600155	-977.107	5.90361e-07
Mtr.18384.1.S1_s_at	MTR_127s0023	Limonene synthase	XM_003638285	-1023.61	1.91697e-06
Mtr.3269.1.S1_at	MTR_6g006346	CCP	XM_003618190	-1031.59	0.000151568
Mtr.12334.1.S1_s_at	MTR_2g065210	CCP	XM_003595972	-1066.95	1.59441e-05
Mtr.26238.1.S1_s_at	MTR_4g060730	CCP	XM_003606424	-1312.55	2.73759e-06
Mtr.48762.1.S1_at	MTR_1g042910	CCP	XM_003589971	-1807.77	4.86344e-06
Mtr.31121.1.S1_s_at	MTR_3g055440	Nodulin	XM_003600153	-2546.76	9.93492e-07
File S4 Table 3. 205 genes (70 genes up-regulated and 135 genes down-regulated) identified (≤-1.5-fold, FDR adjusted P value < 0.1) exposed to ENM in the roots compared to control treatment.
Probeset ID	Gene Symbol	Gene Title	RefSeq Transcript ID	Fold-Change (ENM_shoots vs. Control_shoots)	P-value (ENM_shoots vs. Control_shoots)
Mtr.46283.1.S1_s_at	MTR_2g069300	1-aminocyclopropane-1-carboxylate oxidase-like protein	XM_003596137	57.8882	4.92289e-06
Mtr.14635.1.S1_at	MTR_5g074710	Peroxidase	XM_003615928	42.2048	1.83686e-05
Mtr.35354.1.S1_at	MTR_3g080090	Cation diffusion facilitator	XM_003601332	29.4203	0.000113357
Mtr.11719.1.S1_at	MTR_7g038480	NADPH oxidase	XM_003622455	27.2521	0.000404423
Mtr.41979.1.S1_at	MTR_2g030460	MtN19 protein	XM_003594500	26.3452	9.85404e-05
Mtr.15278.1.S1_s_at	MTR_7g100080	Zinc finger protein	XM_003625474	17.9048	7.90337e-05
Mtr.18952.1.S1_at	MTR_1g092870	Hippocampus abundant transcript-like protein	XM_003591723	15.3893	0.000228642
Mtr.37075.1.S1_at	MTR_5g075680	Metal tolerance protein	XM_003616011	14.3258	8.73728e-05
Mtr.3265.1.S1_at	MTR_2g042340	hypothetical protein	XM_003595261	13.3452	8.3452e-05
Mtr.42756.1.S1_at	MTR_8g018110	F-box protein	XM_003627095	13.1008	7.41563e-05
Mtr.17288.1.S1_at	MTR_3g088460	Metal transporter	XM_003602007	12.6839	5.41e-05
Mtr.1950.1.S1_at	MTR_5g040970	hypothetical protein	XM_003613744	11.8491	1.91252e-05
Mtr.15793.1.S1_at	MTR_5g018990	Cytochrome P450	XM_003611836	10.0326	2.78378e-06
Mtr.32980.1.S1_at	MTR_050s0020	ABC transporter B family member	XM_003636590	9.46021	2.83436e-06
Mtr.29537.1.S1_at	MTR_7g073030	Non-specific lipid-transfer protein	XM_003623556	8.3403	0.000291761
Mtr.45355.1.S1_at	MTR_5g058470	AP2 domain-containing transcription factor	XM_003614691	8.04281	0.000498645
Mtr.23418.1.S1_s_at	MTR_7g020980	Ethylene-responsive transcription factor	XM_003621582	6.96138	0.000638245
Mtr.31266.1.S1_at	MTR_7g089670	F-box protein	XM_003624933	6.75813	0.000346825
Mtr.6122.1.S1_at	MTR_4g092580	Branched-chain-amino-acid aminotransferase	XM_003608269	6.73162	7.99346e-05
Mtr.709.1.S1_at	MTR_6g092670	Type I inositol-1,4,5-trisphosphate 5-phosphatase	XM_003620889	6.48661	5.17893e-06
Mtr.18489.1.S1_at	MTR_6g012160	Quinone oxidoreductase-like protein	XM_003618438	6.44058	1.67639e-07
Mtr.50397.1.S1_at	MTR_7g011090	hypothetical protein	XM_003621215	5.86501	7.08148e-05
Mtr.44470.1.S1_at	MTR_3g030620	F-box protein	XM_003599192	4.98885	0.00051272
Mtr.17298.1.S1_at	MTR_8g088250	hypothetical protein	XM_003629863	4.77715	9.02192e-05
Mtr.25183.1.S1_x_at	MTR_1g088530	hypothetical protein	XM_003591477	4.36348	3.01073e-05
Mtr.37285.1.S1_at	MTR_5g082070	Aquaporin PIP11	XM_003616538	4.28876	0.000882824
Mtr.42318.1.S1_at	MTR_5g076350	Ubiquitin	XM_003616075	4.24015	7.01581e-05
Mtr.52221.1.S1_at	MTR_5g005520	Cysteine-rich receptor-like protein kinase	XM_003610606	3.94443	0.000134194
Mtr.50565.1.S1_at	MTR_3g082440	Endoglucanase	XM_003601458	3.80237	8.96761e-05
Mtr.9679.1.S1_at	MTR_5g037950	Thioredoxin H2	XM_003613501	3.73866	0.000397439
Mtr.2491.1.S1_at	MTR_3g111150	Serpin-ZX	XM_003603639	3.70293	0.00029947
Mtr.17239.1.S1_at	MTR_5g012680	Matrix metalloproteinase-28	XM_003611267	3.67334	0.000422515
Mtr.1800.1.S1_at	MTR_2g048860	hypothetical protein	XM_003595479	3.51997	0.000684768
Mtr.18492.1.S1_s_at	MTR_6g012160	Quinone oxidoreductase-like protein	XM_003618438	3.49622	8.12837e-05
Mtr.3514.1.S1_at	MTR_1g106800	Endo-1 4-beta-xylanase	XM_003592460	3.3238	0.00064854
Mtr.19012.1.S1_at	MTR_5g073830	hypothetical protein	XM_003615860	3.14276	0.000372749
Mtr.14771.1.S1_at	MTR_7g079530	Phosphoglycolate phosphatase	XM_003624080	2.96531	4.4554e-05
Mtr.12525.1.S1_at	MTR_1g099310	Chitinase	XM_003592106	2.87617	7.06729e-05
Mtr.29167.1.S1_at	MTR_7g088590	Protein Mpv17	XM_003624829	2.76815	0.000188482
Mtr.38007.1.S1_at	MTR_1g090250	Oleosin	XM_003591605	2.72883	3.49662e-06
Mtr.38635.1.S1_at	MTR_5g017850	Peroxidase	XM_003611740	2.62207	0.000340594
Mtr.47064.1.S1_at	MTR_7g080120	Swarming motility protein ybiA	XM_003624135	2.58258	0.000113097
Mtr.51929.1.S1_at	MTR_7g099230	hypothetical protein	XM_003625398	2.56429	0.000653682
Mtr.14430.1.S1_at	MTR_1g007580	Metal-nicotianamine transporter YSL2	XM_003588421	2.55278	0.000224666
Mtr.753.1.S1_at	MTR_2g025050	Plastid-lipid-associated protein	XM_003594107	2.30273	0.000408673
Mtr.25966.1.S1_at	MTR_7g072250	hypothetical protein	XM_003623496	2.23418	0.00084493
Mtr.42729.1.S1_at	MTR_5g053270	Protein CHUP1	XM_003614361	2.127	0.000404184
Mtr.52303.1.S1_at	MTR_4g023040	NBS-containing resistance-like protein	XM_003604980	2.12148	0.000438975
Mtr.12385.1.S1_at	MTR_2g069030	Nitrile-specifier protein	XM_003596116	2.06858	0.000415862
Mtr.40721.1.S1_at	MTR_3g080080	Nucleotide exchange factor SIL1	XM_003601331	1.89959	0.000880771
Mtr.1156.1.S1_at	MTR_7g111240	Rhicadhesin receptor	XM_003626072	1.89201	0.000175874
Mtr.24370.1.S1_at	MTR_1g083820	hypothetical protein	XM_003591150	1.86077	0.000198518
Mtr.32228.1.S1_at	MTR_5g017680	Patatin-like protein	XM_003611724	1.85114	0.000363399
Mtr.23614.1.S1_at	MTR_7g073370	hypothetical protein	XM_003623585	1.82497	0.000819001
Mtr.38941.1.S1_s_at	MTR_4g124570	Conserved oligomeric Golgi complex subunit	XM_003609890	1.82161	0.000565559
Mtr.41246.1.S1_at	MTR_7g067450	Auxin transporter-like protein	XM_003623180	1.77768	0.000865217
Mtr.4435.1.S1_at	MTR_5g029600	hypothetical protein	XM_003612787	1.72776	0.000541619
Mtr.25499.1.S1_at	MTR_7g109850	NifU-like protein	XM_003625951	1.69842	3.5799e-05
Mtr.26718.1.S1_at	MTR_1g086480	ADP ribosylation factor	XM_003591304	1.66043	0.000794872
Mtr.41006.1.S1_at	MTR_1g050640	Xylem serine proteinase	XM_003590206	1.64719	0.000137782
Mtr.11520.1.S1_s_at	MTR_3g105730	Protein phosphatase 2C	XM_003603219	1.63538	0.000244093
Mtr.36223.1.S1_s_at	MTR_8g023140	Alanine aminotransferase	XM_003627400	1.58793	0.000206348
Mtr.4373.1.S1_at	MTR_5g011550	ATP-dependent Clp protease ATP-binding subunit clpA-like protein	XM_003611169	1.56464	0.000564841
Mtr.27854.1.S1_at	MTR_032s0036	Quinone oxidoreductase-like protein	XM_003636132	1.55433	0.000204932
Mtr.16767.1.S1_at	MTR_2g062640	Manganese transport protein mntH	XM_003595811	1.53148	0.000524346
Mtr.21791.1.S1_at	MTR_6g012810	Serine/threonine protein kinase	XM_003618493	1.51552	0.000763939
Mtr.22557.1.S1_at	MTR_7g089370	hypothetical protein	XM_003624905	1.51279	0.000223953
Mtr.33693.1.S1_at	MTR_1g039020	hypothetical protein	XM_003589716	1.51111	0.000432326
Mtr.40036.1.S1_at	MTR_4g059520	hypothetical protein	XM_003606344	1.50425	0.000702826
Mtr.41621.1.S1_at	MTR_5g084980	hypothetical protein	XM_003616808	1.50411	4.39667e-05
Mtr.31139.1.S1_at	MTR_8g066150	hypothetical protein	XM_003628683	-1.55575	0.000498549
Mtr.9419.1.S1_at	MTR_4g114770	Methyl binding domain protein	XM_003609307	-1.56631	0.000736262
Mtr.24418.1.S1_at	MTR_1g019410	Abscisic acid 8'-hydroxylase	XM_003589135	-1.70092	0.000569618
Mtr.10713.1.S1_at	MTR_3g116500	Guanine nucleotide-binding protein subunit beta-1	XM_003603863	-1.70866	0.000415696
Mtr.32892.1.S1_at	MTR_2g086070	DNA-directed RNA polymerase	XM_003596733	-1.99014	0.000676612
Mtr.6177.1.S1_at	MTR_1g039450	Cellulose synthase D-like protein	XM_003589755	-2.1348	0.000298401
Mtr.48070.1.S1_at	MTR_6g051680	hypothetical protein	XM_003619324	-2.38922	0.000318814
Mtr.40328.1.S1_at	MTR_1g093120	1-aminocyclopropane-1-carboxylate oxidase-like protein	XM_003591751	-2.64172	0.000107383
Mtr.6956.1.S1_at	MTR_8g020840	Nodulation signaling pathway 1 protein	XM_003627246	-2.65304	9.13885e-05
Mtr.33224.1.S1_s_at	MTR_016s1002	Cc-nbs-lrr resistance protein	XM_003635849	-2.78974	0.00077052
Mtr.152.1.S1_at	MTR_7g074850	Dihydroflavonol-4-reductase	XM_003623668	-2.86666	0.000279514
Mtr.12531.1.S1_s_at	MTR_3g072500	Auxin-induced protein 5NG4	XM_003601005	-2.96889	0.000405323
Mtr.33342.1.S1_at	MTR_6g074730	hypothetical protein	XM_003620002	-3.39445	0.000343176
Mtr.45027.1.S1_at	MTR_7g102460	UDP-glucosyltransferase family 1 protein	XM_003625667	-3.82483	0.000503611
Mtr.5847.1.S1_at	MTR_3g106230	Zinc finger protein	XM_003603265	-4.74815	0.000164272
Mtr.4716.1.S1_at	MTR_7g088790	Peptide transporter PTR5	XM_003624848	-5.59311	0.000512658
Mtr.10604.1.S1_at	MTR_5g059820	Nitrate reductase	XM_003614772	-6.23535	0.000818662
Mtr.45474.1.S1_at	MTR_7g024730	hypothetical protein	XM_003621848	-7.30136	0.000579228
Mtr.10566.1.S1_at	MTR_040s0060	hypothetical protein	XM_003636379	-7.82732	0.000833437
Mtr.40235.1.S1_at	MTR_041s0005	5'-methylthioadenosine/S-adenosylhomocysteine nucleosidase	XM_003636390	-8.33646	0.00041622
Mtr.7556.1.S1_at	MTR_7g085810	Ethylene-responsive transcription factor	XM_003624586	-8.4179	0.00052357
Mtr.31382.1.S1_at	MTR_053s1047	Dihydroflavonol 4-reductase	XM_003636666	-8.78912	0.00029672
Mtr.28851.1.S1_at	MTR_1g068630	Auxin-induced protein 5NG4	XM_003590465	-15.5355	0.000790677
Mtr.40270.1.S1_at	MTR_2g085510	High-affinity nitrate transporter	XM_003596727	-21.4561	0.000148293
Mtr.37330.1.S1_at	MTR_4g082600	hypothetical protein	XM_003607726	-22.2699	0.000810875
Mtr.43750.1.S1_at	MTR_1g056530	Nuclear transcription factor Y subunit A-10	XM_003590278	-23.2103	6.95409e-05
Mtr.12141.1.S1_at	MTR_8g103250	hypothetical protein	XM_003630723	-23.705	0.000888558
Mtr.1110.1.S1_at	MTR_5g082940	RING finger protein	XM_003616617	-25.1795	0.000583306
Mtr.33.1.S1_at	MTR_5g084670	Nodule-specific glycine-rich protein 1J	XM_003616777	-27.3259	2.81573e-05
Mtr.4751.1.S1_at	MTR_5g091550	Ubiquitin carboxyl-terminal hydrolase family protein	XM_003617387	-28.1783	0.000382868
Mtr.42446.1.S1_at	MTR_3g073180	Nitrate reductase	XM_003601066	-28.5966	1.83094e-05
Mtr.26632.1.S1_at	MTR_2g076010	Pathogen-related protein	XM_003596284	-39.0082	0.00038513
Mtr.44840.1.S1_at	MTR_1g026160	Protein kinase like protein	XM_003589519	-40.6282	0.000707733
Mtr.13620.1.S1_at	MTR_7g114890	MtN26 protein	XM_003626374	-55.011	0.000784141
Mtr.21234.1.S1_at	MTR_2g014250	hypothetical protein	XM_003593574	-57.2669	5.63954e-05
Mtr.2262.1.S1_at	MTR_1g042900	Nodule-specific cysteine-rich peptide	XM_003589970	-58.1172	0.000247099
Mtr.3724.1.S1_at	MTR_1g006300	Mitochondrial protein, putative	XM_003588307	-68.2884	0.00032137
Mtr.30154.1.S1_at	MTR_6g045150	CCP	XM_003619194	-72.625	0.000770739
Mtr.3625.1.S1_at	MTR_5g070410	CCP	XM_003615594	-74.211	1.93701e-06
Mtr.13159.1.S1_at	MTR_1g042895	CCP	XM_003589969	-77.0009	2.1839e-05
Mtr.4707.1.S1_at	MTR_5g061290	Ubiquitin	XM_003614873	-77.6149	5.44925e-05
Mtr.46116.1.S1_at	MTR_2g039230	Nodule-specific glycine-rich protein 6A	XM_003595122	-78.7713	0.000573431
Mtr.50864.1.S1_at	MTR_4g116060	Defensin-like protein	XM_003609425	-82.98	0.000497121
Mtr.4676.1.S1_at	MTR_8g089360	High affinity cationic amino acid transporter	XM_003629969	-83.9687	4.83525e-05
Mtr.13449.1.S1_at	MTR_2g030470	MtN19 protein	XM_003594501	-84.7252	2.00675e-05
Mtr.630.1.S1_at	MTR_4g085800	PI-PLC X domain-containing protein	XM_003607900	-95.46	8.0861e-05
Mtr.10249.1.S1_at	MTR_3g033955	CCP	XM_003599432	-103.107	0.000495509
Mtr.14503.1.S1_at	MTR_7g086040	MtN20 protein	XM_003624605	-106.199	9.73351e-06
Mtr.17105.1.S1_at	MTR_4g130780	Early nodulin	XM_003610262	-108.01	0.000764016
Mtr.28123.1.S1_at	MTR_2g104570	CCP	XM_003597926	-108.272	0.000361706
Mtr.30996.1.S1_at	MTR_7g114870	IQ domain-containing protein	XM_003626372	-110.1	1.40191e-05
Mtr.7347.1.S1_at	MTR_7g102170	CCP	XM_003625640	-110.237	0.000403107
Mtr.39654.1.S1_at	MTR_127s0007	Cysteine-rich receptor-like protein kinase	XM_003638269	-111.242	0.000183513
Mtr.9597.1.S1_at	MTR_3g015670	CCP	XM_003598522	-111.78	0.000655866
Mtr.13003.1.S1_at	MTR_8g098650	hypothetical protein	XM_003630498	-118.941	9.42429e-05
Mtr.35829.1.S1_at	MTR_2g054210	CCP	XM_003595577	-133.036	0.000215748
Mtr.18391.1.S1_at	MTR_4g059900	CCP	XM_003606373	-134.823	0.000182759
Mtr.1768.1.S1_at	MTR_3g062880	CCP	XM_003600529	-137.72	0.000688231
Mtr.43740.1.S1_at	MTR_7g114880	MtN26 protein	XM_003626373	-138.834	0.000251544
Mtr.40650.1.S1_at	MTR_2g015470	hypothetical protein	XM_003593675	-140.516	0.000200608
Mtr.43624.1.S1_at	MTR_5g068810	CCP	XM_003615450	-143.413	0.000426552
Mtr.12854.1.S1_at	MTR_2g061175	hypothetical protein	XM_003595771	-155.909	0.000702173
Mtr.26917.1.S1_at	MTR_5g054980	CCP	XM_003614472	-158.374	0.000413021
Mtr.2244.1.S1_at	MTR_7g071220	CCP	XM_003623421	-159.769	5.17338e-05
Mtr.9000.1.S1_at	MTR_3g044690	CCP	XM_003599714	-167.981	0.000325221
Mtr.10869.1.S1_at	MTR_7g051320	CCP	XM_003622675	-181.457	0.00071292
Mtr.10784.1.S1_at	MTR_3g031320	CCP	XM_003599248	-185.571	0.000834495
Mtr.2006.1.S1_at	MTR_5g068590	CCP	XM_003615429	-188.716	3.87155e-05
Mtr.49328.1.S1_at	MTR_5g084260	Nodule-specific glycine-rich protein 1L	XM_003616740	-189.483	0.000198556
Mtr.28086.1.S1_at	MTR_4g060610	CCP	XM_003606415	-191.926	0.000569673
Mtr.8904.1.S1_s_at	MTR_3g031340	CCP	XM_003599250	-191.928	0.000635969
Mtr.41022.1.S1_at	MTR_5g059445	CCP	XM_003614752	-200.176	0.000756424
Mtr.44665.1.S1_at	MTR_2g042480	Nodule-specific glycine-rich protein 2A	XM_003595273	-226.396	0.000270071
Mtr.4943.1.S1_s_at	MTR_5g072456	CCP	XM_003615750	-230.965	0.000397247
Mtr.43453.1.S1_at	MTR_2g048205	CCP	XM_003595431	-232.849	0.000663672
Mtr.11429.1.S1_x_at	MTR_7g027120	CCP	XM_003622043	-241.844	6.46852e-05
Mtr.38489.1.S1_at	MTR_3g018870	CCP	XM_003598605	-247.135	0.000330743
Mtr.18548.1.S1_at	MTR_4g053180	CCP	XM_003606061	-247.598	0.000320669
Mtr.38373.1.S1_at	MTR_5g062510	CCP	XM_003614962	-250.088	0.000442098
Mtr.44040.1.S1_at	MTR_5g044140	Nodule-specific cysteine-rich peptide	XM_003614001	-251.809	0.000117787
Mtr.37700.1.S1_at	MTR_3g030060	CCP	XM_003599150	-262.367	0.000252625
Mtr.15206.1.S1_at	MTR_4g070690	CCP	XM_003606918	-263.31	2.04634e-06
Mtr.8510.1.S1_at	MTR_1g030270	Early nodulin	XM_003589532	-264.497	3.88972e-06
Mtr.338.1.S1_at	MTR_4g031520	CCP	XM_003605400	-269.837	0.000524866
Mtr.26231.1.S1_x_at	MTR_4g060660	CCP	XM_003606419	-280.297	0.00020469
Mtr.3277.1.S1_at	MTR_7g032920	CCP	XM_003622267	-282.514	0.00016321
Mtr.43386.1.S1_at	MTR_5g063600	CCP	XM_003615043	-296.554	0.000426896
Mtr.27456.1.S1_s_at	MTR_4g033830	CCP	XM_003605515	-301.204	0.000304559
Mtr.3210.1.S1_at	MTR_7g029760	CCP	XM_003622127	-302.932	9.14049e-05
Mtr.40907.1.S1_at	MTR_5g069545	CCP	XM_003615513	-303.604	0.00018294
Mtr.40512.1.S1_at	MTR_086s0024	CCP	XM_003637400	-305.775	0.000170884
Mtr.10467.1.S1_at	MTR_6g091470	Nodule-specific cysteine-rich peptide	XM_003620807	-313.941	2.03812e-05
Mtr.27430.1.S1_at	MTR_4g060000	CCP	XM_003606380	-320.711	7.08335e-05
Mtr.29504.1.S1_at	MTR_3g062820	CCP	XM_003600523	-329.23	0.000288135
Mtr.40467.1.S1_at	MTR_7g065770	Early nodulin ENOD18	XM_003623165	-333.721	7.34916e-05
Mtr.40135.1.S1_at	MTR_6g057520	CCP	XM_003619477	-338.494	0.000254941
Mtr.35425.1.S1_s_at	MTR_5g072450	CCP	XM_003615748	-357.347	0.000287797
Mtr.7542.1.S1_at	MTR_3g065690	CCP	XM_003600687	-362.226	0.000313866
Mtr.51113.1.S1_s_at	MTR_5g069100	CCP	XM_003615476	-367.491	0.000654374
Mtr.17934.1.S1_s_at	MTR_6g055160	CCP	XM_003619421	-409.163	0.000277558
Mtr.42875.1.S1_s_at	MTR_7g071720	CCP	XM_003623450	-411.798	0.000122137
Mtr.38519.1.S1_at	MTR_3g055510	Calmodulin-like protein	XM_003600161	-419.58	0.0001076
Mtr.37625.1.S1_at	MTR_3g016020	CCP	XM_003598543	-434.902	5.47024e-05
Mtr.49594.1.S1_at	MTR_2g103310	hypothetical protein	XM_003597807	-453.658	4.75441e-05
Mtr.38556.1.S1_at	MTR_3g010490	CCP	XM_003598292	-457.06	0.000349852
Mtr.43635.1.S1_at	MTR_5g061800	CCP	XM_003614913	-463.085	0.000349898
Mtr.40336.1.S1_at	MTR_054s0031	CCP	XM_003636688	-467.675	1.39306e-05
Mtr.11160.1.S1_at	MTR_7g022430	CCP	XM_003621705	-488.12	0.000145663
Mtr.43351.1.S1_at	MTR_3g015870	CCP	XM_003598536	-493.627	2.18606e-05
Mtr.37302.1.S1_s_at	MTR_021s0032	CCP	XM_003635943	-496.414	4.12643e-05
Mtr.8699.1.S1_at	MTR_2g042470	Nodule-specific glycine-rich protein 2D	XM_003595272	-501.945	2.43981e-05
Mtr.13022.1.S1_at	MTR_2g061035	hypothetical protein	XM_003595758	-504.901	4.32384e-05
Mtr.23804.1.S1_x_at	MTR_3g084820	CCP	XM_003601685	-511.377	0.000774794
Mtr.44286.1.S1_at	MTR_5g026080	CCP	XM_003612484	-512.954	0.000185277
Mtr.40140.1.S1_at	MTR_5g081000	Leghemoglobin	XM_003616444	-514.865	0.000670622
Mtr.40226.1.S1_at	MTR_7g027180	CCP	XM_003622046	-523.869	1.81219e-06
Mtr.8340.1.S1_s_at	MTR_4g065160	CCP	XM_003606698	-537.327	8.1515e-05
Mtr.8556.1.S1_at	MTR_5g055370	CCP	XM_003614505	-542.22	0.000192901
Mtr.52342.1.S1_at	MTR_1g042940	CCP	XM_003589972	-555.724	0.000233932
Mtr.9238.1.S1_at	MTR_7g045520	CCP	XM_003622520	-557.805	5.58549e-05
Mtr.10578.1.S1_at	MTR_3g055570	Calmodulin-like protein	XM_003600165	-588.616	7.77299e-05
Mtr.40227.1.S1_x_at	MTR_7g027125	CCP	XM_003622044	-595.94	9.18341e-06
Mtr.43113.1.S1_at	MTR_3g065710	CCP	XM_003600689	-643.717	2.19621e-05
Mtr.40134.1.S1_x_at	MTR_1g011540	Leghemoglobin	XM_003588641	-646.307	7.63751e-05
Mtr.10836.1.S1_at	MTR_4g026750	CCP	XM_003605169	-676.8	1.4228e-05
Mtr.40251.1.S1_at	MTR_6g091440	CCP	XM_003620804	-785.801	2.01901e-05
Mtr.43103.1.S1_s_at	MTR_5g056185	CCP	XM_003614564	-814.351	2.73819e-05
Mtr.8477.1.S1_at	MTR_3g062775	CCP	XM_003600519	-904.715	9.54739e-07
Mtr.40309.1.S1_s_at	MTR_3g055450	hypothetical protein	XM_003600155	-977.107	5.90361e-07
Mtr.18384.1.S1_s_at	MTR_127s0023	Limonene synthase	XM_003638285	-1023.61	1.91697e-06
Mtr.3269.1.S1_at	MTR_6g006346	CCP	XM_003618190	-1031.59	0.000151568
Mtr.12334.1.S1_s_at	MTR_2g065210	CCP	XM_003595972	-1066.95	1.59441e-05
Mtr.26238.1.S1_s_at	MTR_4g060730	CCP	XM_003606424	-1312.55	2.73759e-06
Mtr.48762.1.S1_at	MTR_1g042910	CCP	XM_003589971	-1807.77	4.86344e-06
Mtr.31121.1.S1_s_at	MTR_3g055440	Nodulin	XM_003600153	-2546.76	9.93492e-07
